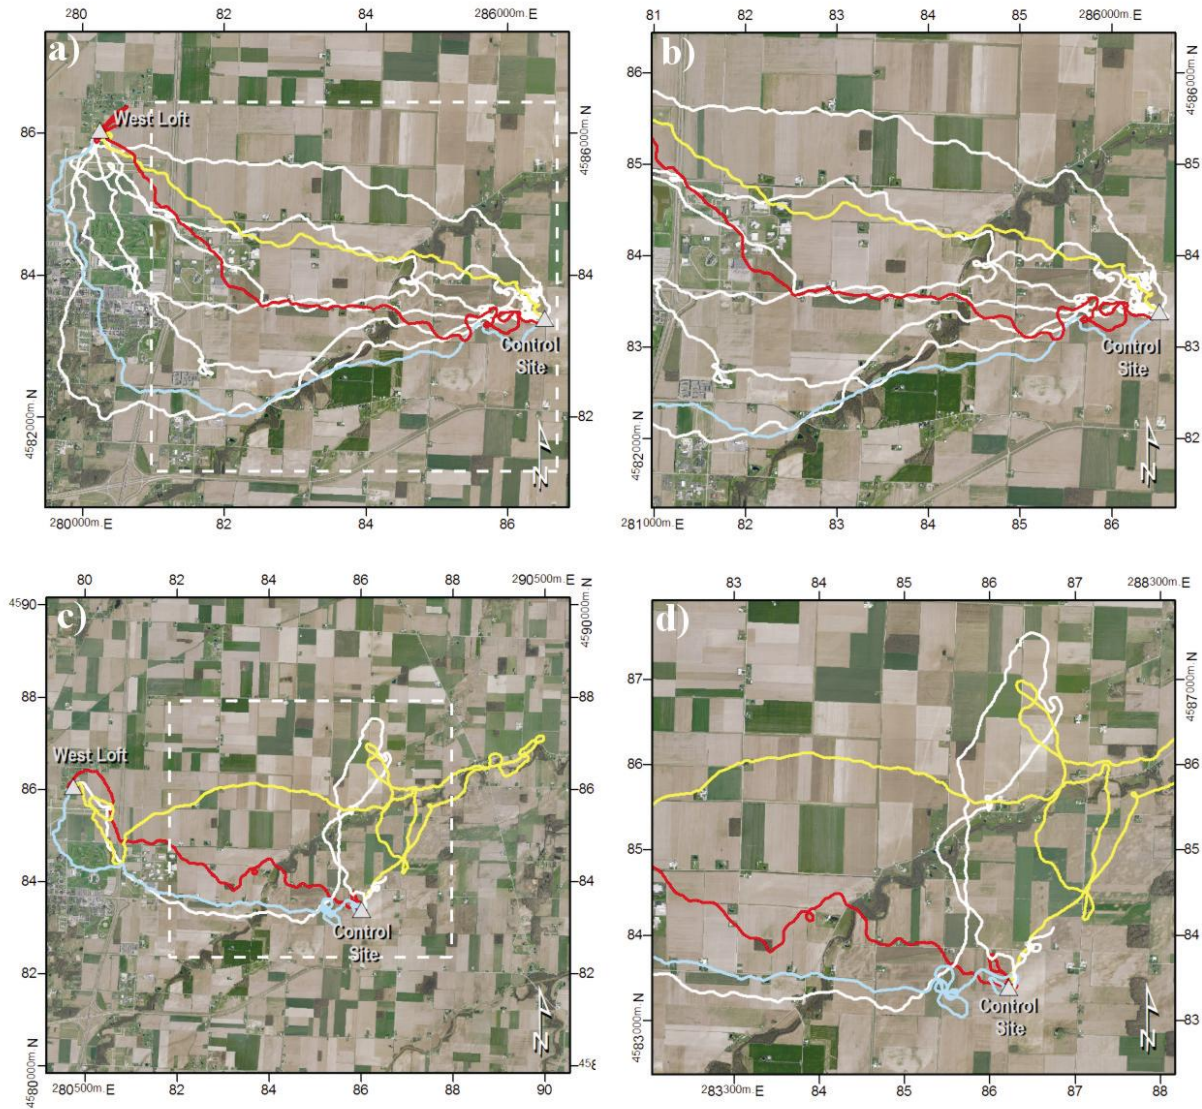

**Fig. S1.** GPS tracks of homing pigeons released pre- and post-clock-shift (CS, 6 h slow) manipulation at the control site. Dashed frames for (a) pre-CS release and (c) post-CS release encapsulate enlarged regions shown in b and d, respectively. Tracks for the same pigeon flying in both releases from a site are identified by the color of the track (bird no. 425, 427 and 438 in blue, yellow and red, respectively). Units on axes are easting and northing coordinates (in meters) based on the UTM system. It should be noted that four complete tracks (blue, yellow, red and white) and one incomplete track (in white; data acquisition by the GPS unit was lost shortly after release) are shown. Of these five tracks, three (the two white tracks and the yellow one) showed the expected CS deflection during initial orientation.

Table S1. Vanishing direction of individual pigeons released pre- and post-6 h slow clock-shift (CS) treatment at two familiar release sites (with and without distinctive landmarks)

| Control site (home direction 293 deg) |                           |             |                           | Turbine site (home direction 77 deg) |                           |             |                           |
|---------------------------------------|---------------------------|-------------|---------------------------|--------------------------------------|---------------------------|-------------|---------------------------|
| Pre-CS                                |                           | Post-CS     |                           | Pre-CS                               |                           | Post-CS     |                           |
| Bird number                           | Vanishing direction (deg) | Bird number | Vanishing direction (deg) | Bird number                          | Vanishing direction (deg) | Bird number | Vanishing direction (deg) |
| 214                                   | 269                       | 214         | 4                         | 214                                  | 108                       | 276         | 110                       |
| 276                                   | 330                       | 276         | 340                       | 276                                  | 80                        | 418         | 170                       |
| 418                                   | 276                       | 422         | 355                       | 424                                  | 71                        | 424         | 117                       |
| 422                                   | 287                       | 424         | 329                       | 425                                  | 104                       | 425         | 118                       |
| 424                                   | 255                       | 427         | 38                        | 427                                  | 116                       | 428         | 195                       |
| 425                                   | 254                       | 430         | 351                       | 428                                  | 82                        | 430         | 86                        |
| 427                                   | 311                       | 431         | 308                       | 430                                  | 106                       | 437         | 84                        |
| 428                                   | 270                       | 432         | 349                       | 431                                  | 96                        | 438         | 174                       |
| 430                                   | 268                       | 437         | 350                       | 432                                  | 113                       |             |                           |
| 432                                   | 274                       | 438         | 286                       | 437                                  | 97                        |             |                           |
| 438                                   | 252                       | 445         | 343                       | 438                                  | 90                        |             |                           |
